# Supplementary material
Source: publisher figshare collection journal article supplement (https://acs.figshare.com/ndownloader/files/5099854)
Supplement: Supplementary file 1 [file 5099854]

# CIF-file generated for  C52H50BD16O2Sc                CP583    

#==============================================================================
data_global
#===================================================
# 0. AUDIT DETAILS

_audit_creation_date                 '2001-02-23  16:16:36'
_audit_creation_method               'PLATON <TABLE ACC> option' 
_audit_update_record                
;
 ?
;

#===============================================================================

# 1. SUBMISSION DETAILS

_publ_contact_author_name           # Name  of author for correspondence
;
   Drs. A. Meetsma
;
_publ_contact_author_address        # Address of author for correspondence
;
     Crystal Structure Center,
     Inorganic Solid State Chemistry Laboratory
     Chemical Physics,
     Materials Science Center,
     Groningen University,
     Nijenborgh 4,
     NL-9747 AG Groningen,
     The Netherlands.
;
_publ_contact_author_email           A.Meetsma@fwn.rug.nl
_publ_contact_author_fax             '+31 50 3634441'
_publ_contact_author_phone           '+31 50 3634368'

_publ_requested_journal                 'JACS'
# Publication choise FI FM FO CI CM CO
_publ_requested_category             ?
_publ_requested_coeditor_name        ?

_publ_contact_letter                # Include date of submission
;
 Date of submission :  2004-05-14  09:50:00

 Consider this CIF submission for deposition of the 1-st
 X-ray structure of a manuscript to be submitted to : JACS
  (Our Compound_Identification_Code : CP583)
;

#===============================================================================

# 2. PROCESSING SUMMARY (JOURNAL OFFICE ONLY)

_journal_date_recd_electronic        ?

_journal_date_to_coeditor            ?
_journal_date_from_coeditor          ?
_journal_date_accepted               ?

_journal_date_printers_first         ?
_journal_date_printers_final         ?
_journal_date_proofs_out             ?
_journal_date_proofs_in              ?

_journal_coeditor_name               ?
_journal_coeditor_code               ?
_journal_coeditor_notes             
; ?
;

_journal_techeditor_code             ?
_journal_techeditor_notes           
; ?
;

_journal_coden_ASTM                  ?
_journal_name_full                   ?
_journal_year                        ?
_journal_volume                      ?
_journal_issue                       ?
_journal_page_first                  ?
_journal_page_last                   ?


_journal_suppl_publ_number           ?
_journal_suppl_publ_pages            ?


#===============================================================================

# 3. TITLE AND AUTHOR LIST

_publ_section_title                 
;
 ?
;
_publ_section_title_footnote        
;
 ?
;

# The loop structure below should contain the names and adresses of all
# authors, in the required order of publication. Repeat as necessary.


loop_
_publ_author_name                   
_publ_author_footnote               
_publ_author_address                

   'Meetsma, Auke'
;
 ? # author related footnote
;
;
     Crystal Structure Center,
     Inorganic Solid State Chemistry Laboratory
     Chemical Physics,
     Materials Science Center,
     Groningen University,
     Nijenborgh 4,
     NL-9747 AG Groningen,
     The Netherlands.
;

#===============================================================================

# 4. TEXT

_publ_section_synopsis              
;
 ?
;
_publ_section_abstract              
;
 ?
;

# Insert blank lines between paragraphs

_publ_section_comment               
;
 ?
;
_publ_section_exptl_prep            
;
 ?
;
_publ_section_exptl_refinement      
;
 ?
;

# Insert blank lines between references

_publ_section_references            
;

 Beurskens, P.T., Beurskens, G., Gelder, R. de   Garc\'ia-Granda, S.
  Gould, R.O.  Isra\"el, & Smits, J.M.M. (1999).
  The DIRDIF99 program system, Technical Report of the Crystallography 
   Laboratory, University of Nijmegen, The Netherlands.

 Bruker, (2000). SMART, SAINT, SADABS, XPREP and  SHELXTL/NT.
  Software Reference Manual Bruker AXS Inc. Madison, Wisconsin, USA.

 International Tables for Crystallography (1983). Vol. A. 
   Space-group symmetry, edited by T. Hahn. Dordrecht: Reidel.
   (Present distributor Kluwer Academic Publishers, Dordrecht).

 International Tables for Crystallography (1992). Vol. C. 
   Edited by A.J.C Wilson, Kluwer Academic Publishers, 
   Dordrecht, The Netherlands.

 Le Page, Y. (1987). J. Appl. Cryst. 20, 264-269.

 Le Page, Y. (1988). J. Appl. Cryst. 21, 983-984.

 Meetsma, A. (2000). Extended version of the program PLUTO. 
   Groningen University, The Netherlands. (unpublished). 

 Sheldrick, G.M. SHELXL97. Program for crystal structure
   refinement. University of G\"ottingen, Germany, 1997.

 Sheldrick, G.M. SADABS. Version 2. Empirical Absorption Correction Program.
   University of G\"ottingen, Germany, 2000

 Spek, A.L. (1988). J. Appl. Cryst. 21, 578-579.

 Spek, A.L. (1990). Acta Cryst. A46, C-34.

 Spek, A.L. (1994). Am. Crystallogr. Assoc.-Abstracts, 22, 66.

;


_publ_section_figure_captions       
;
     Fig. 1. Chemical structural diagram (scheme 1) of the title compound

     Fig. 2. Perspective PLUTO drawing of the molecule illustrating the
             configuration and the adopted numbering scheme.

     Fig. 3. Molecular packing viewed down unit cell axes.

     Fig. 4. Perspective ORTEP drawing of the title compound. 
             All non-hydrogen atoms are represented by thermal vibrational
             ellipsoids drawn to encompass 50% of the electron density.
             The hydrogen atoms are drawn with an arbitrary radius.
;

#===============================================================================

data_c52h50bd

#===============================================================================

# 5. CHEMICAL DATA

_chemical_name_systematic           
;
 ?
;
_chemical_name_common                ?
_chemical_melting_point              ?
_chemical_formula_moiety            
'C28 H30 D16 O2 Sc, C24 H20 B'
_chemical_formula_structural         ?
# Ex: 'C12 H16 N2 O6, H2 O' and '(Cd 2+)3, (C6 N6 Cr 3-)2, 2(H2 O)' 
_chemical_formula_sum               
'C52 H50 D16 B O2 Sc'
_chemical_formula_weight                794.85
_chemical_compound_source           'see text'

loop_
_atom_type_symbol                   
_atom_type_description              
_atom_type_scat_dispersion_real     
_atom_type_scat_dispersion_imag     
_atom_type_scat_source              
Sc  Sc    0.2519    0.3716
 'International Tables Vol C Tables 4.2.6.8 and 6.1.1.4'
 O   O    0.0106    0.0060
 'International Tables Vol C Tables 4.2.6.8 and 6.1.1.4'
 B   B    0.0013    0.0007
 'International Tables Vol C Tables 4.2.6.8 and 6.1.1.4'
 D   D    0.0000    0.0000
 'International Tables Vol C Tables 4.2.6.8 and 6.1.1.4'
 H   H    0.0000    0.0000
 'International Tables Vol C Tables 4.2.6.8 and 6.1.1.4'
 C   C    0.0033    0.0016
 'International Tables Vol C Tables 4.2.6.8 and 6.1.1.4'

#===============================================================================

# 6. CRYSTAL DATA

_symmetry_cell_setting                 Monoclinic
_symmetry_space_group_name_Hall      '-P 2ybc'
_symmetry_space_group_name_H-M       'P 21/c'

loop_
_symmetry_equiv_pos_as_xyz          
 x,y,z                         
 -x,1/2+y,1/2-z                
 -x,-y,-z                      
 x,1/2-y,1/2+z                 

_cell_length_a                         10.4868(5)
_cell_length_b                         21.575(1)
_cell_length_c                         18.957(1)
_cell_angle_alpha                      90
_cell_angle_beta                       95.8060(10)
_cell_angle_gamma                      90
_cell_volume                         4267.1(4)
_cell_formula_units_Z                 4

_cell_measurement_temperature        90
_cell_measurement_reflns_used      4470
_cell_measurement_theta_min        2.17
_cell_measurement_theta_max       24.49
_cell_special_details
;
 The final unit cell was obtained from the xyz centroids of 
   4470 reflections after integration using the SAINT software
   package (Bruker, 2000). 

;

_exptl_crystal_description        'block'
_exptl_crystal_colour             'yellow'

_exptl_crystal_size_max           0.320 
_exptl_crystal_size_mid           0.210 
_exptl_crystal_size_min           0.170 
_exptl_crystal_size_rad           ? 
_exptl_crystal_density_meas       ? 
_exptl_crystal_density_diffrn     1.237 
_exptl_crystal_density_method     'Not Measured' 
_exptl_crystal_F_000              1680 
_exptl_absorpt_coefficient_mu     0.213 
_exptl_absorpt_correction_type    'Multi-Scan'            
_exptl_absorpt_process_details     'SADABS (Sheldrick, Bruker, 2000)'
_exptl_absorpt_correction_T_min   0.7920 
_exptl_absorpt_correction_T_max   0.9647 
 

#===============================================================================

# 7. EXPERIMENTAL DATA

_exptl_special_details 
; 
 ? 
; 
 
_diffrn_ambient_temperature       90(2) 
_diffrn_radiation_wavelength      0.71073 
_diffrn_radiation_type            MoK\a 
_diffrn_radiation_source             'fine focus sealed Siemens Mo tube '
_diffrn_radiation_monochromator      'parallel mounted graphite'
_diffrn_radiation_detector          
;
  CCD area-detector

     scintillation NaI crystal with photomultiplier
;
_diffrn_measurement_device_type     
;
  Bruker Smart Apex 
  Enraf Nonius CAD-4F diffractometer
;

_diffrn_measurement_method           'phi and omega scans'
_diffrn_special_details             
;
 Crystal into the cold nitrogen stream of the low-temparature
  unit (KRYOFLEX, (Bruker, 2000)).
;
_diffrn_detector_area_resol_mean     ?

_diffrn_standards_number             ?
_diffrn_standards_interval_count     ?
_diffrn_standards_interval_time      ?
_diffrn_standards_decay_%             ?
loop_
_diffrn_standard_refln_index_h      
_diffrn_standard_refln_index_k      
_diffrn_standard_refln_index_l      
 ? ? ?

# number of measured reflections (redundant set)
_diffrn_reflns_number             40893 
_diffrn_reflns_av_R_equivalents   0.0792 
_diffrn_reflns_av_sigmaI/netI     0.0968 
_diffrn_reflns_limit_h_min        -14 
_diffrn_reflns_limit_h_max        14 
_diffrn_reflns_limit_k_min        -30 
_diffrn_reflns_limit_k_max        28 
_diffrn_reflns_limit_l_min        -26 
_diffrn_reflns_limit_l_max        25 
_diffrn_reflns_theta_min          2.17 
_diffrn_reflns_theta_max          29.81 
_diffrn_measured_fraction_theta_max    0.905 
_diffrn_reflns_theta_full              25.1 
_diffrn_measured_fraction_theta_full   0.99 

_diffrn_reflns_reduction_process    
;
 Intensity data were corrected for Lorentz and polarization
  effects, decay and absorption and reduced to F~o~^2^
  using SAINT (Bruker, 2000) and SABABS (Sheldrick, 2000)
;

# number of unique reflections
_reflns_number_total              11341 
_reflns_number_gt                 7212 
_reflns_threshold_expression      >2sigma(I) 
 

_computing_data_collection          'SMART, Bruker Version 5.168, 2000'
_computing_cell_refinement          'SAINT, Bruker Version 6.02A, 2000'
_computing_data_reduction           'XPREP, Bruker Version 5.1/NT, 2000'
_computing_structure_solution       
;
 DIRDIF-99 (Beurskens et al., 1999)
;
_computing_structure_refinement      'SHELXL-97 (Sheldrick, 1997)'
_computing_molecular_graphics       
;
 PLUTO (Meetsma, 2000) 
 PLATON (Spek, 1994, 1996)
;
_computing_publication_material     
;
 PLATON (Spek, 1990)
 SHELXL (Sheldrick, 1997)
;

#===============================================================================

# 8. REFINEMENT DATA
 
_refine_special_details 
; 
 Refinement of F^2^ against ALL reflections.  The weighted R-factor wR and 
 goodness of fit S are based on F^2^, conventional R-factors R are based 
 on F, with F set to zero for negative F^2^. The threshold expression of 
 F^2^ > 2sigma(F^2^) is used only for calculating R-factors(gt) etc. and is 
 not relevant to the choice of reflections for refinement.  R-factors based 
 on F^2^ are statistically about twice as large as those based on F, and R- 
 factors based on ALL data will be even larger. 
; 
 
_refine_ls_structure_factor_coef  Fsqd  
_refine_ls_matrix_type                  full 
_refine_ls_weighting_scheme     calc 
_refine_ls_weighting_details 
 'calc w=1/[\s^2^(Fo^2^)+(0.0542P)^2^+0.1137P] where P=(Fo^2^+2Fc^2^)/3' 
_atom_sites_solution_primary         heavy
_atom_sites_solution_secondary    direct 
_atom_sites_solution_hydrogens    difmap
_refine_ls_hydrogen_treatment     refall
_refine_ls_extinction_method      none 
_refine_ls_extinction_coef        ? 
_refine_ls_abs_structure_details   ?
_refine_ls_abs_structure_Flack    ? 
_refine_ls_number_reflns          11341 
_refine_ls_number_parameters      769 
_refine_ls_number_restraints      0 
_refine_ls_number_constraints     ? 
_refine_ls_R_factor_all           0.1046 
_refine_ls_R_factor_gt            0.0557 
_refine_ls_wR_factor_ref          0.1295 
_refine_ls_wR_factor_gt           0.1119 
_refine_ls_goodness_of_fit_ref    1.015 
_refine_ls_restrained_S_all       1.015 
_refine_ls_shift/su_max           0.000 
_refine_ls_shift/su_mean          0.000 
 
_refine_diff_density_max          0.394 
_refine_diff_density_min         -0.401 
_refine_diff_density_rms          0.066 

#===============================================================================

# 9. ATOMIC COORDINATES AND THERMAL PARAMETERS

loop_
_atom_site_label                    
_atom_site_type_symbol              
_atom_site_thermal_displace_type    
_atom_site_fract_x                  
_atom_site_fract_y                  
_atom_site_fract_z                  
_atom_site_occupancy                
_atom_site_U_iso_or_equiv           
 Sc     Sc Uani    0.05036(3)   0.06139(2)   0.27481(2)     1.000    0.0114(1)  
 O1     O  Uani  -0.07886(13)   0.03555(6)   0.17403(7)     1.000    0.0164(4)  
 O2     O  Uani  -0.02615(13)   0.15964(6)   0.27168(7)     1.000    0.0162(4)  
 C1     C  Uani   0.27780(19)   0.09750(9)  0.28952(11)     1.000    0.0165(6)  
 C2     C  Uani   0.28650(19)  0.03214(10)  0.28428(11)     1.000    0.0181(6)  
 C3     C  Uani   0.23584(19)   0.01406(9)  0.21526(11)     1.000    0.0172(6)  
 C4     C  Uani   0.19838(18)   0.06883(9)  0.17722(10)     1.000    0.0154(6)  
 C5     C  Uani   0.22431(18)   0.11982(9)  0.22277(10)     1.000    0.0146(6)  
 C6     C  Uani     0.3388(2)  0.13582(11)  0.35057(13)     1.000    0.0230(7)  
 C7     C  Uani     0.3714(2) -0.00956(13)  0.33226(14)     1.000    0.0288(8)  
 C8     C  Uani     0.2522(2) -0.04928(10)  0.18462(14)     1.000    0.0256(8)  
 C9     C  Uani     0.1633(2)  0.07438(11)  0.09856(12)     1.000    0.0214(7)  
 C10    C  Uani     0.2162(2)  0.18626(10)  0.19855(13)     1.000    0.0206(7)  
 C11    C  Uani    -0.0053(2)   0.06245(9)  0.40253(10)     1.000    0.0170(6)  
 C12    C  Uani  -0.12290(19)   0.05751(9)  0.35939(11)     1.000    0.0166(6)  
 C13    C  Uani  -0.12573(19)  -0.00010(9)  0.32421(10)     1.000    0.0164(6)  
 C14    C  Uani  -0.00803(19)  -0.03126(9)  0.34486(10)     1.000    0.0161(6)  
 C15    C  Uani   0.06491(19)   0.00751(9)  0.39483(10)     1.000    0.0160(6)  
 C16    C  Uani     0.0300(3)  0.10978(11)  0.45976(12)     1.000    0.0250(7)  
 C17    C  Uani    -0.2356(2)  0.10046(12)  0.35740(14)     1.000    0.0267(8)  
 C18    C  Uani    -0.2423(2) -0.02648(12)  0.28198(13)     1.000    0.0274(8)  
 C19    C  Uani     0.0259(3) -0.09704(10)  0.32882(15)     1.000    0.0282(8)  
 C20    C  Uani     0.1768(2) -0.01086(12)  0.44627(13)     1.000    0.0243(7)  
 C21    C  Uani    -0.0726(2) -0.02867(10)  0.14988(12)     1.000    0.0206(7)  
 C22    C  Uani    -0.1794(2) -0.03525(10)  0.09069(11)     1.000    0.0199(6)  
 C23    C  Uani    -0.1754(2)   0.02766(9)  0.05492(11)     1.000    0.0186(6)  
 C24    C  Uani    -0.1537(2)  0.07145(10)  0.11746(11)     1.000    0.0172(6)  
 C25    C  Uani    -0.1244(2)  0.18696(10)  0.22065(12)     1.000    0.0205(7)  
 C26    C  Uani    -0.1518(2)  0.25061(10)  0.24889(13)     1.000    0.0251(7)  
 C27    C  Uani    -0.0246(2)  0.26814(10)  0.28931(13)     1.000    0.0227(7)  
 C28    C  Uani     0.0171(2)  0.20738(10)  0.32392(12)     1.000    0.0207(7)  
 C29    C  Uani     0.4985(2)   0.20569(8) -0.07758(11)     1.000    0.0160(6)  
 C30    C  Uani     0.3717(2)  0.18437(10) -0.08775(12)     1.000    0.0217(7)  
 C31    C  Uani     0.3087(3)  0.17385(10) -0.15479(13)     1.000    0.0280(8)  
 C32    C  Uani     0.3696(3)  0.18397(10) -0.21471(13)     1.000    0.0291(8)  
 C33    C  Uani     0.4936(3)  0.20651(11) -0.20719(13)     1.000    0.0287(8)  
 C34    C  Uani     0.5553(2)  0.21739(10) -0.14017(12)     1.000    0.0229(7)  
 C35    C  Uani   0.51164(19)   0.28664(9)  0.02475(10)     1.000    0.0162(6)  
 C36    C  Uani     0.5632(2)   0.34352(9)  0.00605(11)     1.000    0.0192(6)  
 C37    C  Uani     0.5087(2)  0.40031(10)  0.02018(12)     1.000    0.0231(7)  
 C38    C  Uani     0.3982(2)  0.40268(11)  0.05435(12)     1.000    0.0264(7)  
 C39    C  Uani     0.3429(2)  0.34751(11)  0.07259(12)     1.000    0.0277(8)  
 C40    C  Uani     0.3984(2)  0.29112(10)  0.05821(12)     1.000    0.0221(7)  
 C41    C  Uani   0.54083(18)   0.16452(9)  0.05838(11)     1.000    0.0158(6)  
 C42    C  Uani     0.5500(2)  0.17578(10)  0.13137(12)     1.000    0.0201(7)  
 C43    C  Uani     0.5326(2)  0.12976(11)  0.18074(13)     1.000    0.0254(7)  
 C44    C  Uani     0.5084(2)  0.06956(12)  0.15858(13)     1.000    0.0288(8)  
 C45    C  Uani     0.5001(2)  0.05588(10)  0.08677(13)     1.000    0.0249(7)  
 C46    C  Uani     0.5152(2)  0.10312(10)  0.03810(12)     1.000    0.0197(7)  
 C47    C  Uani   0.72691(19)   0.21909(9)  0.00295(10)     1.000    0.0151(6)  
 C48    C  Uani     0.7880(2)  0.17357(10) -0.03490(12)     1.000    0.0191(6)  
 C49    C  Uani     0.9200(2)  0.16882(10) -0.03315(12)     1.000    0.0222(7)  
 C50    C  Uani     0.9990(2)  0.20951(10)  0.00722(12)     1.000    0.0226(7)  
 C51    C  Uani     0.9427(2)  0.25368(10)  0.04662(12)     1.000    0.0212(7)  
 C52    C  Uani     0.8099(2)   0.25821(9)  0.04455(11)     1.000    0.0187(6)  
 B      B  Uani     0.5693(2)  0.21979(10)  0.00201(12)     1.000    0.0152(7)  
 H6     H  Uiso      0.330(2)   0.1798(10)   0.3413(11)     1.000     0.020(6)  
 H6'    H  Uiso      0.302(2)   0.1272(10)   0.3971(13)     1.000     0.031(7)  
 H6"    H  Uiso      0.426(3)   0.1273(12)   0.3555(14)     1.000     0.046(8)  
 H7     H  Uiso      0.398(2)   0.0103(10)   0.3753(13)     1.000     0.025(6)  
 H7'    H  Uiso      0.332(2)  -0.0499(11)   0.3412(12)     1.000     0.033(7)  
 H7"    H  Uiso      0.451(2)  -0.0168(11)   0.3093(13)     1.000     0.037(7)  
 H8     H  Uiso      0.226(2)  -0.0499(11)   0.1292(15)     1.000     0.045(8)  
 H8'    H  Uiso      0.342(2)  -0.0621(10)   0.1915(12)     1.000     0.032(7)  
 H8"    H  Uiso      0.203(2)  -0.0831(12)   0.2028(13)     1.000     0.036(7)  
 H9     H  Uiso      0.242(3)   0.0855(12)   0.0769(14)     1.000     0.047(8)  
 H9'    H  Uiso      0.100(2)   0.1099(11)   0.0847(12)     1.000     0.031(6)  
 H9"    H  Uiso      0.129(2)   0.0344(11)   0.0797(12)     1.000     0.027(6)  
 H10    H  Uiso      0.139(2)   0.1944(10)   0.1678(12)     1.000     0.027(6)  
 H10'   H  Uiso      0.224(2)   0.2157(12)   0.2364(14)     1.000     0.044(8)  
 H10"   H  Uiso      0.289(3)   0.1946(12)   0.1727(14)     1.000     0.044(8)  
 H16    H  Uiso      0.107(2)   0.1324(11)   0.4516(12)     1.000     0.031(7)  
 H16'   H  Uiso      0.046(2)   0.0868(10)   0.5051(12)     1.000     0.021(6)  
 H16"   H  Uiso     -0.049(3)   0.1387(13)   0.4633(14)     1.000     0.054(8)  
 H17    H  Uiso     -0.279(2)   0.1052(12)   0.3074(15)     1.000     0.045(8)  
 H17'   H  Uiso     -0.299(3)   0.0837(12)   0.3868(14)     1.000     0.046(8)  
 H17"   H  Uiso     -0.209(2)   0.1404(12)   0.3776(13)     1.000     0.041(8)  
 H18    H  Uiso     -0.307(2)  -0.0305(11)   0.3115(13)     1.000     0.036(7)  
 H18'   H  Uiso     -0.229(2)  -0.0708(12)   0.2622(14)     1.000     0.046(8)  
 H18"   H  Uiso     -0.280(2)   0.0024(11)   0.2412(13)     1.000     0.035(7)  
 H19    H  Uiso     -0.043(4)  -0.1169(15)   0.3017(19)     1.000    0.083(12)  
 H19'   H  Uiso      0.033(4)  -0.1226(16)     0.366(2)     1.000    0.094(13)  
 H19"   H  Uiso      0.078(4)  -0.1001(18)     0.291(2)     1.000    0.115(15)  
 H20    H  Uiso      0.146(2)  -0.0126(10)   0.4959(13)     1.000     0.027(6)  
 H20'   H  Uiso      0.206(2)  -0.0546(11)   0.4319(12)     1.000     0.028(6)  
 H20"   H  Uiso      0.244(2)   0.0197(11)   0.4506(12)     1.000     0.028(6)  
 D21    D  Uiso      0.012(2)   -0.0341(9)   0.1324(10)     1.000     0.014(5)  
 D21'   D  Uiso     -0.079(2)   -0.0553(9)   0.1913(12)     1.000     0.019(6)  
 D22    D  Uiso     -0.164(2)   -0.0717(9)   0.0615(11)     1.000     0.017(6)  
 D22'   D  Uiso     -0.265(2)  -0.0432(10)   0.1134(11)     1.000     0.025(6)  
 D23    D  Uiso     -0.101(2)    0.0300(9)   0.0233(11)     1.000     0.017(6)  
 D23'   D  Uiso     -0.255(2)    0.0391(9)   0.0261(11)     1.000     0.014(5)  
 D24    D  Uiso   -0.2318(19)    0.0829(8)   0.1363(10)     1.000     0.008(5)  
 D24'   D  Uiso   -0.1043(18)    0.1106(9)   0.1080(10)     1.000     0.008(5)  
 D25    D  Uiso     -0.201(2)    0.1575(9)   0.2150(10)     1.000     0.015(5)  
 D25'   D  Uiso   -0.0866(18)    0.1916(8)   0.1762(11)     1.000     0.007(5)  
 D26    D  Uiso     -0.177(2)   0.2800(10)   0.2076(12)     1.000     0.023(6)  
 D26'   D  Uiso     -0.217(2)   0.2475(10)   0.2808(12)     1.000     0.023(6)  
 D27    D  Uiso     -0.027(2)   0.2976(10)   0.3243(12)     1.000     0.028(6)  
 D27'   D  Uiso      0.038(2)    0.2799(9)   0.2546(11)     1.000     0.016(6)  
 D28    D  Uiso      0.105(2)    0.2021(9)   0.3350(11)     1.000     0.016(6)  
 D28'   D  Uiso     -0.029(2)    0.2006(9)   0.3655(11)     1.000     0.017(6)  
 H30    H  Uiso      0.326(2)    0.1764(9)  -0.0479(11)     1.000     0.014(5)  
 H31    H  Uiso      0.224(2)   0.1595(10)  -0.1593(12)     1.000     0.029(7)  
 H32    H  Uiso      0.330(2)   0.1759(10)  -0.2598(12)     1.000     0.023(6)  
 H33    H  Uiso      0.536(2)   0.2136(11)  -0.2506(14)     1.000     0.041(7)  
 H34    H  Uiso      0.642(2)   0.2340(10)  -0.1362(11)     1.000     0.019(6)  
 H36    H  Uiso      0.642(2)    0.3455(9)  -0.0191(12)     1.000     0.021(6)  
 H37    H  Uiso      0.547(2)   0.4398(10)   0.0071(11)     1.000     0.020(6)  
 H38    H  Uiso      0.357(2)   0.4412(11)   0.0655(13)     1.000     0.037(7)  
 H39    H  Uiso      0.269(2)   0.3485(11)   0.0963(13)     1.000     0.034(7)  
 H40    H  Uiso      0.359(2)   0.2544(10)   0.0693(11)     1.000     0.020(6)  
 H42    H  Uiso      0.568(2)    0.2154(9)   0.1487(11)     1.000     0.017(6)  
 H43    H  Uiso      0.539(2)   0.1384(10)   0.2290(13)     1.000     0.028(7)  
 H44    H  Uiso      0.494(2)   0.0372(10)   0.1900(12)     1.000     0.022(6)  
 H45    H  Uiso      0.482(2)   0.0123(10)   0.0708(11)     1.000     0.023(6)  
 H46    H  Uiso      0.505(2)   0.0911(10)  -0.0104(13)     1.000     0.027(6)  
 H48    H  Uiso      0.737(2)    0.1464(9)  -0.0645(11)     1.000     0.016(6)  
 H49    H  Uiso      0.959(2)   0.1372(10)  -0.0588(11)     1.000     0.020(6)  
 H50    H  Uiso      1.088(2)    0.2084(9)   0.0082(11)     1.000     0.019(6)  
 H51    H  Uiso      0.998(2)   0.2797(10)   0.0760(12)     1.000     0.026(6)  
 H52    H  Uiso      0.773(2)   0.2897(10)   0.0720(11)     1.000     0.022(6)  

loop_
_atom_site_aniso_label              
_atom_site_aniso_U_11               
_atom_site_aniso_U_22               
_atom_site_aniso_U_33               
_atom_site_aniso_U_23               
_atom_site_aniso_U_13               
_atom_site_aniso_U_12               
  Sc       0.0120(2)  0.0130(2)  0.0094(2)   0.0002(1)   0.0015(1)   0.0000(1)  
  O1       0.0178(8)  0.0178(7)  0.0133(7)  -0.0014(6)  -0.0005(6)   0.0005(6)  
  O2       0.0189(8)  0.0149(7)  0.0146(7)   0.0008(5)   0.0004(6)   0.0010(6)  
  C1      0.0104(10) 0.0243(10) 0.0152(11)   0.0007(8)   0.0030(8)  -0.0023(8)  
  C2      0.0121(10) 0.0264(11) 0.0165(11)   0.0064(8)   0.0050(8)   0.0026(8)  
  C3      0.0110(10) 0.0191(10) 0.0224(12)  -0.0012(8)   0.0055(9)   0.0018(8)  
  C4      0.0115(10) 0.0226(10) 0.0123(10)  -0.0005(8)   0.0028(8)  -0.0005(8)  
  C5       0.0088(9) 0.0215(10) 0.0139(10)   0.0025(8)   0.0031(8)   0.0004(8)  
  C6      0.0187(12) 0.0332(13) 0.0166(12) -0.0035(10) -0.0009(10) -0.0052(10)  
  C7      0.0214(13) 0.0416(15) 0.0236(14)  0.0137(11)  0.0036(11)  0.0074(11)  
  C8      0.0222(13) 0.0208(11) 0.0343(15) -0.0031(10)  0.0051(11)   0.0043(9)  
  C9      0.0177(12) 0.0327(13) 0.0140(11)  -0.0014(9)   0.0027(9)  0.0006(10)  
  C10     0.0193(12) 0.0216(11) 0.0218(13)   0.0029(9)  0.0066(10)  -0.0022(9)  
  C11     0.0242(11) 0.0181(10) 0.0093(10)   0.0000(8)   0.0042(8)  -0.0048(9)  
  C12     0.0176(11) 0.0191(10) 0.0145(10)   0.0046(8)   0.0085(8)   0.0000(8)  
  C13     0.0173(11) 0.0217(10) 0.0103(10)   0.0033(8)   0.0023(8)  -0.0050(8)  
  C14     0.0214(11)  0.0140(9) 0.0134(10)   0.0033(8)   0.0049(9)  -0.0014(8)  
  C15     0.0170(10) 0.0204(10) 0.0107(10)   0.0039(8)   0.0025(8)  -0.0016(8)  
  C16     0.0380(15) 0.0240(11) 0.0134(12)  -0.0016(9)  0.0052(10) -0.0065(11)  
  C17     0.0237(13) 0.0310(13) 0.0275(14)  0.0064(11)  0.0130(11)  0.0056(10)  
  C18     0.0222(13) 0.0397(14) 0.0202(13)  0.0029(11)  0.0021(10) -0.0119(11)  
  C19     0.0472(17) 0.0148(11) 0.0235(14)   0.0018(9)  0.0075(12)  0.0015(11)  
  C20     0.0228(12) 0.0325(13) 0.0169(12)  0.0079(10) -0.0018(10) -0.0034(10)  
  C21     0.0256(13) 0.0189(10) 0.0167(12)  -0.0024(9) -0.0013(10)   0.0035(9)  
  C22     0.0238(12) 0.0207(10) 0.0147(11)  -0.0042(9)  -0.0008(9)  -0.0003(9)  
  C23     0.0195(11) 0.0229(11) 0.0128(11)  -0.0036(8)  -0.0013(9)   0.0028(9)  
  C24     0.0152(11) 0.0235(11) 0.0128(11)  -0.0013(8)   0.0007(9)   0.0015(9)  
  C25     0.0201(12) 0.0184(10) 0.0226(13)  -0.0002(9)  0.0002(10)   0.0034(9)  
  C26     0.0284(13) 0.0235(11) 0.0235(13) -0.0006(10)  0.0032(11)  0.0083(10)  
  C27     0.0333(14) 0.0156(10) 0.0194(12)  -0.0026(9)  0.0032(10)   0.0010(9)  
  C28     0.0255(13) 0.0195(10) 0.0169(12)  -0.0013(8)  0.0015(10)   0.0003(9)  
  C29     0.0195(11)  0.0119(9) 0.0166(11)   0.0002(8)   0.0018(9)   0.0021(8)  
  C30     0.0230(12) 0.0211(11) 0.0207(12)   0.0036(9)  0.0011(10)  -0.0004(9)  
  C31     0.0291(14) 0.0201(11) 0.0316(14)   0.0039(9) -0.0119(11) -0.0070(10)  
  C32     0.0491(16) 0.0187(11) 0.0164(12)   0.0001(9) -0.0121(12) -0.0021(10)  
  C33     0.0410(15) 0.0292(12) 0.0157(12)   0.0041(9)  0.0020(11)  0.0035(11)  
  C34     0.0252(13) 0.0253(11) 0.0181(12)   0.0017(9)  0.0013(10) -0.0007(10)  
  C35     0.0172(11) 0.0186(10) 0.0120(10)  -0.0005(8)  -0.0022(8)   0.0019(8)  
  C36     0.0193(11) 0.0207(10) 0.0168(11)  -0.0008(8)  -0.0014(9)   0.0006(9)  
  C37     0.0305(13) 0.0170(10) 0.0191(12)  -0.0018(9) -0.0101(10)   0.0029(9)  
  C38     0.0321(14) 0.0265(12) 0.0187(12)  -0.0060(9) -0.0066(10)  0.0135(10)  
  C39     0.0245(13) 0.0411(14) 0.0176(12)  0.0001(10)  0.0020(10)  0.0138(11)  
  C40     0.0217(12) 0.0249(11) 0.0200(12)   0.0038(9)   0.0038(9)   0.0032(9)  
  C41     0.0098(10) 0.0206(10) 0.0172(11)   0.0044(8)   0.0026(8)   0.0010(8)  
  C42     0.0145(11) 0.0262(11) 0.0199(12)   0.0032(9)   0.0032(9)   0.0033(9)  
  C43     0.0136(11) 0.0444(14) 0.0189(13)  0.0096(10)   0.0055(9)  0.0075(10)  
  C44     0.0127(11) 0.0402(14) 0.0344(14)  0.0240(12)  0.0062(10)  0.0020(10)  
  C45     0.0155(11) 0.0226(11) 0.0363(14)  0.0119(10)  0.0016(10)  -0.0021(9)  
  C46     0.0144(11) 0.0235(11) 0.0214(12)   0.0039(9)   0.0021(9)   0.0005(9)  
  C47     0.0192(11)  0.0152(9) 0.0114(10)   0.0041(8)   0.0043(8)  -0.0003(8)  
  C48     0.0197(11) 0.0194(10) 0.0184(12)   0.0009(8)   0.0025(9)  -0.0008(9)  
  C49     0.0269(13) 0.0224(11) 0.0185(12)   0.0038(9)  0.0080(10)   0.0072(9)  
  C50     0.0149(11) 0.0258(11) 0.0273(13)   0.0111(9)  0.0036(10)   0.0028(9)  
  C51     0.0211(12) 0.0191(10) 0.0220(12)   0.0050(9) -0.0043(10)  -0.0026(9)  
  C52     0.0223(12) 0.0187(10) 0.0153(11)   0.0030(8)   0.0027(9)   0.0027(9)  
  B       0.0180(12) 0.0151(10) 0.0125(12)   0.0013(9)   0.0017(9)  -0.0003(9)  

#===============================================================================

# 10. MOLECULAR GEOMETRY

_geom_special_details               
;
 Bond distances, angles etc. have been calculated using the
 rounded fractional coordinates. All esds are estimated
 from the variances of the (full) variance-covariance matrix.
 The cell esds are taken into account in the estimation of
 distances, angles and torsion angles
;

loop_
_geom_bond_atom_site_label_1        
_geom_bond_atom_site_label_2        
_geom_bond_distance                 
_geom_bond_site_symmetry_1          
_geom_bond_site_symmetry_2          
_geom_bond_publ_flag                
 Sc      O1       2.2964(14)                     .       .                   yes
 Sc      O2       2.2652(14)                     .       .                   yes
 Sc      C1         2.498(2)                     .       .                   yes
 Sc      C5       2.5008(19)                     .       .                   yes
 Sc      C14        2.510(2)                     .       .                   yes
 O1      C21        1.463(3)                     .       .                   yes
 O1      C24        1.482(2)                     .       .                   yes
 O2      C25        1.464(3)                     .       .                   yes
 O2      C28        1.468(3)                     .       .                   yes
 C1      C2         1.417(3)                     .       .                   no 
 C1      C5         1.416(3)                     .       .                   no 
 C1      C6         1.511(3)                     .       .                   no 
 C2      C3         1.416(3)                     .       .                   no 
 C2      C7         1.505(3)                     .       .                   no 
 C3      C4         1.419(3)                     .       .                   no 
 C3      C8         1.501(3)                     .       .                   no 
 C4      C5         1.408(3)                     .       .                   no 
 C4      C9         1.504(3)                     .       .                   no 
 C5      C10        1.505(3)                     .       .                   no 
 C11     C12        1.413(3)                     .       .                   no 
 C11     C15        1.411(3)                     .       .                   no 
 C11     C16        1.508(3)                     .       .                   no 
 C12     C13        1.409(3)                     .       .                   no 
 C12     C17        1.499(3)                     .       .                   no 
 C13     C14        1.425(3)                     .       .                   no 
 C13     C18        1.504(3)                     .       .                   no 
 C14     C15        1.427(3)                     .       .                   no 
 C14     C19        1.502(3)                     .       .                   no 
 C15     C20        1.501(3)                     .       .                   no 
 C21     C22        1.510(3)                     .       .                   no 
 C22     C23        1.520(3)                     .       .                   no 
 C23     C24        1.515(3)                     .       .                   no 
 C25     C26        1.512(3)                     .       .                   no 
 C26     C27        1.517(3)                     .       .                   no 
 C27     C28        1.511(3)                     .       .                   no 
 C6      H6          0.97(2)                     .       .                   no 
 C6      H6'         1.02(2)                     .       .                   no 
 C6      H6"         0.93(3)                     .       .                   no 
 C7      H7          0.94(2)                     .       .                   no 
 C7      H7'         0.99(2)                     .       .                   no 
 C7      H7"         0.99(2)                     .       .                   no 
 C8      H8          1.06(3)                     .       .                   no 
 C8      H8'         0.98(2)                     .       .                   no 
 C8      H8"         0.98(2)                     .       .                   no 
 C9      H9          0.99(3)                     .       .                   no 
 C9      H9'         1.03(2)                     .       .                   no 
 C9      H9"         0.99(2)                     .       .                   no 
 C10     H10         0.96(2)                     .       .                   no 
 C10     H10'        0.96(3)                     .       .                   no 
 C10     H10"        0.96(3)                     .       .                   no 
 C16     H16         0.97(2)                     .       .                   no 
 C16     H16'        0.99(2)                     .       .                   no 
 C16     H16"        1.04(3)                     .       .                   no 
 C17     H17         1.01(3)                     .       .                   no 
 C17     H17'        0.98(3)                     .       .                   no 
 C17     H17"        0.97(3)                     .       .                   no 
 C18     H18         0.93(2)                     .       .                   no 
 C18     H18'        1.04(3)                     .       .                   no 
 C18     H18"        1.04(2)                     .       .                   no 
 C19     H19         0.95(4)                     .       .                   no 
 C19     H19'        0.89(4)                     .       .                   no 
 C19     H19"        0.95(4)                     .       .                   no 
 C20     H20         1.03(2)                     .       .                   no 
 C20     H20'        1.04(2)                     .       .                   no 
 C20     H20"        0.96(2)                     .       .                   no 
 C21     D21         0.98(2)                     .       .                   yes
 C21     D21'        0.98(2)                     .       .                   yes
 C22     D22         0.98(2)                     .       .                   yes
 C22     D22'        1.05(2)                     .       .                   yes
 C23     D23         1.03(2)                     .       .                   yes
 C23     D23'        0.98(2)                     .       .                   yes
 C24     D24         0.96(2)                     .       .                   yes
 C24     D24'      1.016(19)                     .       .                   yes
 C25     D25         1.02(2)                     .       .                   yes
 C25     D25'        0.97(2)                     .       .                   yes
 C26     D26         1.02(2)                     .       .                   yes
 C26     D26'        0.96(2)                     .       .                   yes
 C27     D27         0.92(2)                     .       .                   yes
 C27     D27'        1.01(2)                     .       .                   yes
 C28     D28         0.93(2)                     .       .                   yes
 C28     D28'        0.98(2)                     .       .                   yes
 C29     C30        1.402(3)                     .       .                   no 
 C29     C34        1.403(3)                     .       .                   no 
 C29     B          1.641(3)                     .       .                   yes
 C30     C31        1.390(3)                     .       .                   no 
 C31     C32        1.376(4)                     .       .                   no 
 C32     C33        1.382(4)                     .       .                   no 
 C33     C34        1.386(3)                     .       .                   no 
 C35     C36        1.401(3)                     .       .                   no 
 C35     C40        1.405(3)                     .       .                   no 
 C35     B          1.638(3)                     .       .                   yes
 C36     C37        1.389(3)                     .       .                   no 
 C37     C38        1.385(3)                     .       .                   no 
 C38     C39        1.383(3)                     .       .                   no 
 C39     C40        1.388(3)                     .       .                   no 
 C41     C42        1.399(3)                     .       .                   no 
 C41     C46        1.398(3)                     .       .                   no 
 C41     B          1.648(3)                     .       .                   yes
 C42     C43        1.389(3)                     .       .                   no 
 C43     C44        1.381(3)                     .       .                   no 
 C44     C45        1.387(3)                     .       .                   no 
 C45     C46        1.395(3)                     .       .                   no 
 C47     C48        1.408(3)                     .       .                   no 
 C47     C52        1.397(3)                     .       .                   no 
 C47     B          1.651(3)                     .       .                   yes
 C48     C49        1.385(3)                     .       .                   no 
 C49     C50        1.384(3)                     .       .                   no 
 C50     C51        1.380(3)                     .       .                   no 
 C51     C52        1.393(3)                     .       .                   no 
 C30     H30         0.95(2)                     .       .                   no 
 C31     H31         0.94(2)                     .       .                   no 
 C32     H32         0.93(2)                     .       .                   no 
 C33     H33         0.99(3)                     .       .                   no 
 C34     H34         0.97(2)                     .       .                   no 
 C36     H36         1.00(2)                     .       .                   no 
 C37     H37         0.98(2)                     .       .                   no 
 C38     H38         0.97(2)                     .       .                   no 
 C39     H39         0.93(2)                     .       .                   no 
 C40     H40         0.93(2)                     .       .                   no 
 C42     H42         0.93(2)                     .       .                   no 
 C43     H43         0.93(2)                     .       .                   no 
 C44     H44         0.94(2)                     .       .                   no 
 C45     H45         1.00(2)                     .       .                   no 
 C46     H46         0.95(2)                     .       .                   no 
 C48     H48         0.94(2)                     .       .                   no 
 C49     H49         0.95(2)                     .       .                   no 
 C50     H50         0.93(2)                     .       .                   no 
 C51     H51         0.95(2)                     .       .                   no 
 C52     H52         0.96(2)                     .       .                   no 

loop_
_geom_angle_atom_site_label_1       
_geom_angle_atom_site_label_2       
_geom_angle_atom_site_label_3       
_geom_angle                         
_geom_angle_site_symmetry_1         
_geom_angle_site_symmetry_2         
_geom_angle_site_symmetry_3         
_geom_angle_publ_flag               
 O1      Sc      O2         91.59(5)             .       .       .           yes
 O1      Sc      C1        130.17(6)             .       .       .           yes
 O1      Sc      C5        100.77(6)             .       .       .           yes
 O1      Sc      C14        95.27(6)             .       .       .           yes
 O2      Sc      C1         92.45(6)             .       .       .           yes
 O2      Sc      C5         77.79(6)             .       .       .           yes
 O2      Sc      C14       130.88(6)             .       .       .           yes
 C1      Sc      C5         32.90(6)             .       .       .           yes
 C1      Sc      C14       118.08(7)             .       .       .           yes
 C5      Sc      C14       146.82(7)             .       .       .           yes
 Sc      O1      C21      116.68(11)             .       .       .           yes
 Sc      O1      C24      134.43(11)             .       .       .           yes
 C21     O1      C24      107.81(15)             .       .       .           yes
 Sc      O2      C25      128.16(11)             .       .       .           yes
 Sc      O2      C28      123.66(11)             .       .       .           yes
 C25     O2      C28      108.18(15)             .       .       .           yes
 Sc      C1      C2        75.48(12)             .       .       .           yes
 Sc      C1      C5        73.67(11)             .       .       .           yes
 Sc      C1      C6       125.57(14)             .       .       .           yes
 C2      C1      C5       107.36(18)             .       .       .           no 
 C2      C1      C6       124.96(19)             .       .       .           no 
 C5      C1      C6       126.68(18)             .       .       .           no 
 C1      C2      C3       108.54(18)             .       .       .           no 
 C1      C2      C7         126.2(2)             .       .       .           no 
 C3      C2      C7         122.5(2)             .       .       .           no 
 C2      C3      C4       107.39(17)             .       .       .           no 
 C2      C3      C8       124.14(19)             .       .       .           no 
 C4      C3      C8       126.72(19)             .       .       .           no 
 C3      C4      C5       108.22(17)             .       .       .           no 
 C3      C4      C9       126.69(18)             .       .       .           no 
 C5      C4      C9       123.95(18)             .       .       .           no 
 Sc      C5      C1        73.43(11)             .       .       .           yes
 Sc      C5      C4        75.21(11)             .       .       .           yes
 Sc      C5      C10      125.42(13)             .       .       .           yes
 C1      C5      C4       108.47(17)             .       .       .           no 
 C1      C5      C10      126.99(18)             .       .       .           no 
 C4      C5      C10      123.76(18)             .       .       .           no 
 C12     C11     C15      108.11(17)             .       .       .           no 
 C12     C11     C16        127.1(2)             .       .       .           no 
 C15     C11     C16      123.40(19)             .       .       .           no 
 C11     C12     C13      108.40(17)             .       .       .           no 
 C11     C12     C17      127.41(19)             .       .       .           no 
 C13     C12     C17      123.66(19)             .       .       .           no 
 C12     C13     C14      108.05(17)             .       .       .           no 
 C12     C13     C18      124.25(19)             .       .       .           no 
 C14     C13     C18      127.05(18)             .       .       .           no 
 Sc      C14     C13       74.33(11)             .       .       .           yes
 Sc      C14     C15       75.00(11)             .       .       .           yes
 Sc      C14     C19      124.76(15)             .       .       .           yes
 C13     C14     C15      107.28(17)             .       .       .           no 
 C13     C14     C19        127.3(2)             .       .       .           no 
 C15     C14     C19        124.5(2)             .       .       .           no 
 C11     C15     C14      108.12(17)             .       .       .           no 
 C11     C15     C20      122.44(18)             .       .       .           no 
 C14     C15     C20      127.44(19)             .       .       .           no 
 O1      C21     C22      105.56(16)             .       .       .           yes
 C21     C22     C23      101.29(17)             .       .       .           no 
 C22     C23     C24      102.50(17)             .       .       .           no 
 O1      C24     C23      105.49(16)             .       .       .           yes
 O2      C25     C26      106.14(17)             .       .       .           yes
 C25     C26     C27      102.49(17)             .       .       .           no 
 C26     C27     C28      101.78(17)             .       .       .           no 
 O2      C28     C27      105.05(17)             .       .       .           yes
 C1      C6      H6        111.9(13)             .       .       .           no 
 C1      C6      H6'       113.4(13)             .       .       .           no 
 C1      C6      H6"       107.8(16)             .       .       .           no 
 H6      C6      H6'       107.4(17)             .       .       .           no 
 H6      C6      H6"          107(2)             .       .       .           no 
 H6'     C6      H6"          109(2)             .       .       .           no 
 C2      C7      H7        111.0(14)             .       .       .           no 
 C2      C7      H7'       113.5(13)             .       .       .           no 
 C2      C7      H7"       107.5(14)             .       .       .           no 
 H7      C7      H7'       110.3(19)             .       .       .           no 
 H7      C7      H7"       105.3(19)             .       .       .           no 
 H7'     C7      H7"       108.8(19)             .       .       .           no 
 C3      C8      H8        111.5(13)             .       .       .           no 
 C3      C8      H8'       110.6(13)             .       .       .           no 
 C3      C8      H8"       117.3(14)             .       .       .           no 
 H8      C8      H8'       106.2(18)             .       .       .           no 
 H8      C8      H8"       104.3(19)             .       .       .           no 
 H8'     C8      H8"       106.1(19)             .       .       .           no 
 C4      C9      H9        107.5(16)             .       .       .           no 
 C4      C9      H9'       113.5(13)             .       .       .           no 
 C4      C9      H9"       109.5(13)             .       .       .           no 
 H9      C9      H9'          105(2)             .       .       .           no 
 H9      C9      H9"          111(2)             .       .       .           no 
 H9'     C9      H9"       110.8(18)             .       .       .           no 
 C5      C10     H10       112.1(13)             .       .       .           no 
 C5      C10     H10'      114.0(16)             .       .       .           no 
 C5      C10     H10"      108.0(16)             .       .       .           no 
 H10     C10     H10'      109.6(19)             .       .       .           no 
 H10     C10     H10"         109(2)             .       .       .           no 
 H10'    C10     H10"         104(2)             .       .       .           no 
 C11     C16     H16       112.0(14)             .       .       .           no 
 C11     C16     H16'      107.0(13)             .       .       .           no 
 C11     C16     H16"      108.2(15)             .       .       .           no 
 H16     C16     H16'      108.6(18)             .       .       .           no 
 H16     C16     H16"         113(2)             .       .       .           no 
 H16'    C16     H16"      108.0(19)             .       .       .           no 
 C12     C17     H17       111.3(14)             .       .       .           no 
 C12     C17     H17'      109.7(16)             .       .       .           no 
 C12     C17     H17"      110.1(13)             .       .       .           no 
 H17     C17     H17'         108(2)             .       .       .           no 
 H17     C17     H17"         111(2)             .       .       .           no 
 H17'    C17     H17"         107(2)             .       .       .           no 
 C13     C18     H18       108.6(15)             .       .       .           no 
 C13     C18     H18'      114.1(12)             .       .       .           no 
 C13     C18     H18"      113.4(13)             .       .       .           no 
 H18     C18     H18'         105(2)             .       .       .           no 
 H18     C18     H18"      105.0(19)             .       .       .           no 
 H18'    C18     H18"         110(2)             .       .       .           no 
 C14     C19     H19          111(2)             .       .       .           no 
 C14     C19     H19'         115(2)             .       .       .           no 
 C14     C19     H19"         113(2)             .       .       .           no 
 H19     C19     H19'          98(3)             .       .       .           no 
 H19     C19     H19"          91(3)             .       .       .           no 
 H19'    C19     H19"         123(4)             .       .       .           no 
 C15     C20     H20       107.9(12)             .       .       .           no 
 C15     C20     H20'      107.6(12)             .       .       .           no 
 C15     C20     H20"      113.1(14)             .       .       .           no 
 H20     C20     H20'      109.7(18)             .       .       .           no 
 H20     C20     H20"      104.0(18)             .       .       .           no 
 H20'    C20     H20"      114.4(18)             .       .       .           no 
 O1      C21     D21       106.8(11)             .       .       .           yes
 O1      C21     D21'      107.2(12)             .       .       .           yes
 C22     C21     D21       111.4(11)             .       .       .           yes
 C22     C21     D21'      115.7(13)             .       .       .           yes
 D21     C21     D21'      109.7(17)             .       .       .           yes
 C21     C22     D22       110.0(12)             .       .       .           yes
 C21     C22     D22'      108.2(11)             .       .       .           yes
 C23     C22     D22       116.7(12)             .       .       .           yes
 C23     C22     D22'      113.1(12)             .       .       .           yes
 D22     C22     D22'      107.2(17)             .       .       .           yes
 C22     C23     D23       111.1(11)             .       .       .           yes
 C22     C23     D23'      114.4(12)             .       .       .           yes
 C24     C23     D23       111.2(11)             .       .       .           yes
 C24     C23     D23'      109.3(12)             .       .       .           yes
 D23     C23     D23'      108.3(17)             .       .       .           yes
 O1      C24     D24       106.0(11)             .       .       .           yes
 O1      C24     D24'      108.7(11)             .       .       .           yes
 C23     C24     D24       112.7(11)             .       .       .           yes
 C23     C24     D24'      114.8(11)             .       .       .           yes
 D24     C24     D24'      108.8(15)             .       .       .           yes
 O2      C25     D25       108.2(11)             .       .       .           yes
 O2      C25     D25'      107.0(11)             .       .       .           yes
 C26     C25     D25       115.3(11)             .       .       .           yes
 C26     C25     D25'      108.8(10)             .       .       .           yes
 D25     C25     D25'      111.0(15)             .       .       .           yes
 C25     C26     D26       109.7(13)             .       .       .           yes
 C25     C26     D26'      109.4(13)             .       .       .           yes
 C27     C26     D26       112.2(12)             .       .       .           yes
 C27     C26     D26'      110.2(13)             .       .       .           yes
 D26     C26     D26'      112.4(18)             .       .       .           yes
 C26     C27     D27       116.7(13)             .       .       .           yes
 C26     C27     D27'      109.3(12)             .       .       .           yes
 C28     C27     D27       108.3(14)             .       .       .           yes
 C28     C27     D27'      108.8(11)             .       .       .           yes
 D27     C27     D27'      111.3(18)             .       .       .           yes
 O2      C28     D28       107.3(12)             .       .       .           yes
 O2      C28     D28'      107.2(12)             .       .       .           yes
 C27     C28     D28       116.1(12)             .       .       .           yes
 C27     C28     D28'      109.6(12)             .       .       .           yes
 D28     C28     D28'      111.0(18)             .       .       .           yes
 C30     C29     C34      114.87(19)             .       .       .           no 
 C30     C29     B        121.46(18)             .       .       .           yes
 C34     C29     B        123.55(18)             .       .       .           yes
 C29     C30     C31        122.4(2)             .       .       .           no 
 C30     C31     C32        120.8(3)             .       .       .           no 
 C31     C32     C33        118.8(2)             .       .       .           no 
 C32     C33     C34        120.1(2)             .       .       .           no 
 C29     C34     C33        123.1(2)             .       .       .           no 
 C36     C35     C40      114.80(18)             .       .       .           no 
 C36     C35     B        122.84(17)             .       .       .           yes
 C40     C35     B        122.05(17)             .       .       .           yes
 C35     C36     C37      123.15(19)             .       .       .           no 
 C36     C37     C38        120.2(2)             .       .       .           no 
 C37     C38     C39        118.5(2)             .       .       .           no 
 C38     C39     C40        120.7(2)             .       .       .           no 
 C35     C40     C39        122.6(2)             .       .       .           no 
 C42     C41     C46      115.39(19)             .       .       .           no 
 C42     C41     B        121.12(17)             .       .       .           yes
 C46     C41     B        123.34(18)             .       .       .           yes
 C41     C42     C43        122.8(2)             .       .       .           no 
 C42     C43     C44        120.0(2)             .       .       .           no 
 C43     C44     C45        119.4(2)             .       .       .           no 
 C44     C45     C46        119.6(2)             .       .       .           no 
 C41     C46     C45        122.8(2)             .       .       .           no 
 C48     C47     C52      114.79(18)             .       .       .           no 
 C48     C47     B        120.49(17)             .       .       .           yes
 C52     C47     B        124.48(17)             .       .       .           yes
 C47     C48     C49        123.0(2)             .       .       .           no 
 C48     C49     C50        120.5(2)             .       .       .           no 
 C49     C50     C51        118.2(2)             .       .       .           no 
 C50     C51     C52        121.0(2)             .       .       .           no 
 C47     C52     C51      122.51(19)             .       .       .           no 
 C31     C30     H30       117.8(13)             .       .       .           no 
 C29     C30     H30       119.8(13)             .       .       .           no 
 C30     C31     H31       119.7(14)             .       .       .           no 
 C32     C31     H31       119.5(14)             .       .       .           no 
 C33     C32     H32       119.3(13)             .       .       .           no 
 C31     C32     H32       121.9(14)             .       .       .           no 
 C32     C33     H33       117.9(14)             .       .       .           no 
 C34     C33     H33       122.0(14)             .       .       .           no 
 C29     C34     H34       118.3(12)             .       .       .           no 
 C33     C34     H34       118.6(12)             .       .       .           no 
 C37     C36     H36       115.6(11)             .       .       .           no 
 C35     C36     H36       121.3(11)             .       .       .           no 
 C36     C37     H37       121.9(13)             .       .       .           no 
 C38     C37     H37       117.9(12)             .       .       .           no 
 C37     C38     H38       123.1(13)             .       .       .           no 
 C39     C38     H38       118.4(13)             .       .       .           no 
 C40     C39     H39       119.9(15)             .       .       .           no 
 C38     C39     H39       119.3(15)             .       .       .           no 
 C35     C40     H40       117.4(13)             .       .       .           no 
 C39     C40     H40       119.9(13)             .       .       .           no 
 C41     C42     H42       120.1(13)             .       .       .           no 
 C43     C42     H42       117.1(13)             .       .       .           no 
 C44     C43     H43       118.7(14)             .       .       .           no 
 C42     C43     H43       121.2(14)             .       .       .           no 
 C43     C44     H44       122.8(14)             .       .       .           no 
 C45     C44     H44       117.8(14)             .       .       .           no 
 C46     C45     H45       121.2(12)             .       .       .           no 
 C44     C45     H45       119.2(12)             .       .       .           no 
 C41     C46     H46       121.6(13)             .       .       .           no 
 C45     C46     H46       115.5(13)             .       .       .           no 
 C47     C48     H48       118.6(13)             .       .       .           no 
 C49     C48     H48       118.4(13)             .       .       .           no 
 C50     C49     H49       118.2(13)             .       .       .           no 
 C48     C49     H49       121.3(13)             .       .       .           no 
 C49     C50     H50       122.5(12)             .       .       .           no 
 C51     C50     H50       119.3(12)             .       .       .           no 
 C50     C51     H51       117.2(13)             .       .       .           no 
 C52     C51     H51       121.8(13)             .       .       .           no 
 C51     C52     H52       119.4(13)             .       .       .           no 
 C47     C52     H52       118.1(13)             .       .       .           no 
 C29     B       C41      111.54(16)             .       .       .           yes
 C29     B       C47      111.56(16)             .       .       .           yes
 C35     B       C47      113.63(16)             .       .       .           yes
 C41     B       C47      103.48(15)             .       .       .           yes
 C35     B       C41      111.74(16)             .       .       .           yes
 C29     B       C35      105.09(15)             .       .       .           yes

loop_
_geom_torsion_atom_site_label_1     
_geom_torsion_atom_site_label_2     
_geom_torsion_atom_site_label_3     
_geom_torsion_atom_site_label_4     
_geom_torsion                       
_geom_torsion_site_symmetry_1       
_geom_torsion_site_symmetry_2       
_geom_torsion_site_symmetry_3       
_geom_torsion_site_symmetry_4       
_geom_torsion_publ_flag             
 O2      Sc      O1      C21     -178.12(13)     .       .       .       .   no 
 O2      Sc      O1      C24       15.53(16)     .       .       .       .   no 
 C1      Sc      O1      C21       87.33(14)     .       .       .       .   no 
 C1      Sc      O1      C24      -79.02(17)     .       .       .       .   no 
 C5      Sc      O1      C21      104.01(13)     .       .       .       .   no 
 C5      Sc      O1      C24      -62.34(17)     .       .       .       .   no 
 C14     Sc      O1      C21      -46.81(13)     .       .       .       .   no 
 C14     Sc      O1      C24      146.83(16)     .       .       .       .   no 
 O1      Sc      O2      C25        1.32(15)     .       .       .       .   no 
 O1      Sc      O2      C28     -179.46(14)     .       .       .       .   no 
 C1      Sc      O2      C25      131.65(15)     .       .       .       .   no 
 C1      Sc      O2      C28      -49.14(14)     .       .       .       .   no 
 C5      Sc      O2      C25      102.00(15)     .       .       .       .   no 
 C5      Sc      O2      C28      -78.79(14)     .       .       .       .   no 
 C14     Sc      O2      C25      -97.04(16)     .       .       .       .   no 
 C14     Sc      O2      C28       82.17(15)     .       .       .       .   no 
 O1      Sc      C1      C2       -82.12(13)     .       .       .       .   no 
 O1      Sc      C1      C5        31.27(14)     .       .       .       .   no 
 O1      Sc      C1      C6       155.03(15)     .       .       .       .   no 
 O2      Sc      C1      C2      -176.27(12)     .       .       .       .   no 
 O2      Sc      C1      C5       -62.88(11)     .       .       .       .   no 
 O2      Sc      C1      C6        60.88(17)     .       .       .       .   no 
 C5      Sc      C1      C2      -113.39(17)     .       .       .       .   no 
 C5      Sc      C1      C6         123.8(2)     .       .       .       .   no 
 C14     Sc      C1      C2        43.79(14)     .       .       .       .   no 
 C14     Sc      C1      C5       157.18(11)     .       .       .       .   no 
 C14     Sc      C1      C6       -79.06(18)     .       .       .       .   no 
 O1      Sc      C5      C1      -156.19(11)     .       .       .       .   no 
 O1      Sc      C5      C4       -41.32(12)     .       .       .       .   no 
 O1      Sc      C5      C10       79.84(17)     .       .       .       .   no 
 O2      Sc      C5      C1       114.51(12)     .       .       .       .   no 
 O2      Sc      C5      C4      -130.62(12)     .       .       .       .   no 
 O2      Sc      C5      C10       -9.46(16)     .       .       .       .   no 
 C1      Sc      C5      C4       114.87(16)     .       .       .       .   no 
 C1      Sc      C5      C10       -124.0(2)     .       .       .       .   no 
 C14     Sc      C5      C1       -38.70(17)     .       .       .       .   no 
 C14     Sc      C5      C4        76.17(16)     .       .       .       .   no 
 C14     Sc      C5      C10     -162.67(15)     .       .       .       .   no 
 O1      Sc      C14     C13      -57.79(11)     .       .       .       .   no 
 O1      Sc      C14     C15     -171.03(11)     .       .       .       .   no 
 O1      Sc      C14     C19       67.11(19)     .       .       .       .   no 
 O2      Sc      C14     C13       38.91(14)     .       .       .       .   no 
 O2      Sc      C14     C15      -74.33(13)     .       .       .       .   no 
 O2      Sc      C14     C19      163.81(17)     .       .       .       .   no 
 C1      Sc      C14     C13      160.63(11)     .       .       .       .   no 
 C1      Sc      C14     C15       47.39(13)     .       .       .       .   no 
 C1      Sc      C14     C19        -74.5(2)     .       .       .       .   no 
 C5      Sc      C14     C13     -176.73(12)     .       .       .       .   no 
 C5      Sc      C14     C15       70.03(16)     .       .       .       .   no 
 C5      Sc      C14     C19        -51.8(2)     .       .       .       .   no 
 Sc      O1      C21     C22      171.65(12)     .       .       .       .   no 
 C24     O1      C21     C22        -18.5(2)     .       .       .       .   no 
 Sc      O1      C24     C23      159.54(13)     .       .       .       .   no 
 C21     O1      C24     C23         -7.7(2)     .       .       .       .   no 
 Sc      O2      C25     C26      172.25(12)     .       .       .       .   no 
 C28     O2      C25     C26         -7.1(2)     .       .       .       .   no 
 Sc      O2      C28     C27      162.30(12)     .       .       .       .   no 
 C25     O2      C28     C27        -18.4(2)     .       .       .       .   no 
 C6      C1      C5      Sc        -122.5(2)     .       .       .       .   no 
 Sc      C1      C2      C3        65.95(14)     .       .       .       .   no 
 Sc      C1      C2      C7        -132.6(2)     .       .       .       .   no 
 C5      C1      C2      C3          -1.4(2)     .       .       .       .   no 
 C5      C1      C2      C7         160.0(2)     .       .       .       .   no 
 C6      C1      C2      C3      -170.53(19)     .       .       .       .   no 
 C6      C1      C2      C7          -9.1(3)     .       .       .       .   no 
 Sc      C1      C5      C4       -67.65(14)     .       .       .       .   no 
 Sc      C1      C5      C10        122.2(2)     .       .       .       .   no 
 C2      C1      C5      Sc        68.58(14)     .       .       .       .   no 
 C2      C1      C5      C4           0.9(2)     .       .       .       .   no 
 C6      C1      C5      C4       169.82(19)     .       .       .       .   no 
 C6      C1      C5      C10         -0.3(3)     .       .       .       .   no 
 C2      C1      C5      C10     -169.23(19)     .       .       .       .   no 
 C1      C2      C3      C8       167.11(19)     .       .       .       .   no 
 C7      C2      C3      C4      -160.95(19)     .       .       .       .   no 
 C1      C2      C3      C4           1.3(2)     .       .       .       .   no 
 C7      C2      C3      C8           4.8(3)     .       .       .       .   no 
 C2      C3      C4      C5          -0.7(2)     .       .       .       .   no 
 C2      C3      C4      C9       167.38(19)     .       .       .       .   no 
 C8      C3      C4      C9           2.1(3)     .       .       .       .   no 
 C8      C3      C4      C5      -166.05(19)     .       .       .       .   no 
 C3      C4      C5      Sc       -66.58(14)     .       .       .       .   no 
 C3      C4      C5      C1          -0.1(2)     .       .       .       .   no 
 C9      C4      C5      Sc       124.89(19)     .       .       .       .   no 
 C9      C4      C5      C1      -168.64(18)     .       .       .       .   no 
 C3      C4      C5      C10      170.43(18)     .       .       .       .   no 
 C9      C4      C5      C10          1.9(3)     .       .       .       .   no 
 C15     C11     C12     C13         -0.6(2)     .       .       .       .   no 
 C15     C11     C12     C17        171.3(2)     .       .       .       .   no 
 C16     C11     C12     C13       -167.5(2)     .       .       .       .   no 
 C16     C11     C12     C17          4.4(4)     .       .       .       .   no 
 C12     C11     C15     C14          1.7(2)     .       .       .       .   no 
 C12     C11     C15     C20     -163.31(19)     .       .       .       .   no 
 C16     C11     C15     C14        169.2(2)     .       .       .       .   no 
 C16     C11     C15     C20          4.2(3)     .       .       .       .   no 
 C11     C12     C13     C14         -0.7(2)     .       .       .       .   no 
 C11     C12     C13     C18      170.61(19)     .       .       .       .   no 
 C17     C12     C13     C14       -172.9(2)     .       .       .       .   no 
 C17     C12     C13     C18         -1.6(3)     .       .       .       .   no 
 C12     C13     C14     Sc       -66.65(14)     .       .       .       .   no 
 C12     C13     C14     C15          1.7(2)     .       .       .       .   no 
 C18     C13     C14     Sc         122.4(2)     .       .       .       .   no 
 C18     C13     C14     C15     -169.28(19)     .       .       .       .   no 
 C18     C13     C14     C19          0.3(3)     .       .       .       .   no 
 C12     C13     C14     C19        171.3(2)     .       .       .       .   no 
 Sc      C14     C15     C11       65.81(14)     .       .       .       .   no 
 Sc      C14     C15     C20       -130.2(2)     .       .       .       .   no 
 C13     C14     C15     C20        161.9(2)     .       .       .       .   no 
 C19     C14     C15     C11       -172.0(2)     .       .       .       .   no 
 C13     C14     C15     C11         -2.1(2)     .       .       .       .   no 
 C19     C14     C15     C20         -8.0(3)     .       .       .       .   no 
 O1      C21     C22     C23         37.0(2)     .       .       .       .   no 
 C21     C22     C23     C24        -40.9(2)     .       .       .       .   no 
 C22     C23     C24     O1          30.4(2)     .       .       .       .   no 
 O2      C25     C26     C27         29.4(2)     .       .       .       .   no 
 C25     C26     C27     C28        -39.7(2)     .       .       .       .   no 
 C26     C27     C28     O2          36.1(2)     .       .       .       .   no 
 C34     C29     C30     C31          1.9(3)     .       .       .       .   no 
 B       C29     C30     C31      178.10(19)     .       .       .       .   no 
 C30     C29     C34     C33         -2.5(3)     .       .       .       .   no 
 B       C29     C34     C33       -178.6(2)     .       .       .       .   no 
 C30     C29     B       C35        -77.3(2)     .       .       .       .   no 
 C30     C29     B       C41         43.9(2)     .       .       .       .   no 
 C30     C29     B       C47      159.13(18)     .       .       .       .   no 
 C34     C29     B       C35         98.6(2)     .       .       .       .   no 
 C34     C29     B       C41     -140.19(19)     .       .       .       .   no 
 C34     C29     B       C47        -25.0(3)     .       .       .       .   no 
 C29     C30     C31     C32          0.2(4)     .       .       .       .   no 
 C30     C31     C32     C33         -1.8(3)     .       .       .       .   no 
 C31     C32     C33     C34          1.2(4)     .       .       .       .   no 
 C32     C33     C34     C29          1.0(4)     .       .       .       .   no 
 C40     C35     C36     C37          1.0(3)     .       .       .       .   no 
 B       C35     C36     C37      174.66(19)     .       .       .       .   no 
 C36     C35     C40     C39         -0.9(3)     .       .       .       .   no 
 B       C35     C40     C39       -174.7(2)     .       .       .       .   no 
 C36     C35     B       C29        -85.7(2)     .       .       .       .   no 
 C36     C35     B       C41      153.21(18)     .       .       .       .   no 
 C36     C35     B       C47         36.6(3)     .       .       .       .   no 
 C40     C35     B       C29         87.6(2)     .       .       .       .   no 
 C40     C35     B       C41        -33.6(3)     .       .       .       .   no 
 C40     C35     B       C47     -150.20(19)     .       .       .       .   no 
 C35     C36     C37     C38          0.1(3)     .       .       .       .   no 
 C36     C37     C38     C39         -1.2(3)     .       .       .       .   no 
 C37     C38     C39     C40          1.3(3)     .       .       .       .   no 
 C38     C39     C40     C35         -0.2(3)     .       .       .       .   no 
 C46     C41     C42     C43         -1.2(3)     .       .       .       .   no 
 B       C41     C42     C43     -176.92(19)     .       .       .       .   no 
 C42     C41     C46     C45         -0.2(3)     .       .       .       .   no 
 B       C41     C46     C45      175.39(19)     .       .       .       .   no 
 C42     C41     B       C29     -156.71(18)     .       .       .       .   no 
 C42     C41     B       C35        -39.4(2)     .       .       .       .   no 
 C42     C41     B       C47         83.2(2)     .       .       .       .   no 
 C46     C41     B       C29         27.9(3)     .       .       .       .   no 
 C46     C41     B       C35      145.20(19)     .       .       .       .   no 
 C46     C41     B       C47        -92.2(2)     .       .       .       .   no 
 C41     C42     C43     C44          1.8(3)     .       .       .       .   no 
 C42     C43     C44     C45         -0.8(3)     .       .       .       .   no 
 C43     C44     C45     C46         -0.5(3)     .       .       .       .   no 
 C44     C45     C46     C41          1.1(3)     .       .       .       .   no 
 C52     C47     C48     C49         -2.0(3)     .       .       .       .   no 
 B       C47     C48     C49       -176.6(2)     .       .       .       .   no 
 C48     C47     C52     C51          1.9(3)     .       .       .       .   no 
 B       C47     C52     C51      176.33(19)     .       .       .       .   no 
 C48     C47     B       C29        -41.8(2)     .       .       .       .   no 
 C48     C47     B       C35     -160.40(18)     .       .       .       .   no 
 C48     C47     B       C41         78.2(2)     .       .       .       .   no 
 C52     C47     B       C29      144.06(19)     .       .       .       .   no 
 C52     C47     B       C35         25.5(3)     .       .       .       .   no 
 C52     C47     B       C41        -95.9(2)     .       .       .       .   no 
 C47     C48     C49     C50          0.3(3)     .       .       .       .   no 
 C48     C49     C50     C51          1.5(3)     .       .       .       .   no 
 C49     C50     C51     C52         -1.5(3)     .       .       .       .   no 
 C50     C51     C52     C47         -0.2(3)     .       .       .       .   no 

loop_
_geom_contact_atom_site_label_1     
_geom_contact_atom_site_label_2     
_geom_contact_distance              
_geom_contact_site_symmetry_1       
_geom_contact_site_symmetry_2       
_geom_contact_publ_flag             
 Sc      C8         3.720(2)                     .       .                   no 
 Sc      C16        3.685(2)                     .       .                   no 
 Sc      C17        3.620(2)                     .       .                   no 
 O1      C3         3.346(2)                     .       .                   no 
 O1      C9         3.152(3)                     .       .                   no 
 O1      C18        3.103(3)                     .       .                   no 
 O2      C17        3.133(3)                     .       .                   no 
 O2      C11        3.239(2)                     .       .                   no 
 O2      C12        2.998(2)                     .       .                   no 
 O1      H18"        2.67(2)                     .       .                   no 
 O2      H10         2.85(2)                     .       .                   no 
 C2      C44        3.587(3)                     .       .                   no 
 C2      C15        3.326(3)                     .       .                   no 
 C2      C20        3.511(3)                     .       .                   no 
 C3      C44        3.373(3)                     .       .                   no 
 C3      O1         3.346(2)                     .       .                   no 
 C3      C21        3.469(3)                     .       .                   no 
 C4      C44        3.306(3)                     .       .                   no 
 C4      C21        3.531(3)                     .       .                   no 
 C5      C44        3.502(3)                     .       .                   no 
 C5      C43        3.414(3)                     .       .                   no 
 C7      C20        3.119(3)                     .       .                   no 
 C7      C37        3.532(3)                     .     2_645                 no 
 C7      C15        3.556(3)                     .       .                   no 
 C8      C21        3.432(3)                     .       .                   no 
 C8      Sc         3.720(2)                     .       .                   no 
 C9      O1         3.152(3)                     .       .                   no 
 C9      C24        3.380(3)                     .       .                   no 
 C9      C21        3.535(3)                     .       .                   no 
 C9      C45        3.584(3)                     .       .                   no 
 C10     C28        3.350(3)                     .       .                   no 
 C10     C43        3.583(3)                     .       .                   no 
 C10     C32        3.549(3)                     .     4_555                 no 
 C11     C28        3.482(3)                     .       .                   no 
 C11     O2         3.239(2)                     .       .                   no 
 C12     O2         2.998(2)                     .       .                   no 
 C13     C21        3.462(3)                     .       .                   no 
 C15     C2         3.326(3)                     .       .                   no 
 C15     C7         3.556(3)                     .       .                   no 
 C16     Sc         3.685(2)                     .       .                   no 
 C16     C28        3.319(3)                     .       .                   no 
 C16     C51        3.540(3)                     .     4_455                 no 
 C17     O2         3.133(3)                     .       .                   no 
 C17     Sc         3.620(2)                     .       .                   no 
 C17     C25        3.489(3)                     .       .                   no 
 C18     O1         3.103(3)                     .       .                   no 
 C18     C21        3.216(3)                     .       .                   no 
 C20     C2         3.511(3)                     .       .                   no 
 C20     C7         3.119(3)                     .       .                   no 
 C21     C13        3.462(3)                     .       .                   no 
 C21     C9         3.535(3)                     .       .                   no 
 C21     C8         3.432(3)                     .       .                   no 
 C21     C18        3.216(3)                     .       .                   no 
 C21     C3         3.469(3)                     .       .                   no 
 C21     C4         3.531(3)                     .       .                   no 
 C22     C31        3.548(3)                     .     3_555                 no 
 C23     C48        3.581(3)                     .     1_455                 no 
 C23     C45        3.568(3)                     .     1_455                 no 
 C24     C25        3.164(3)                     .       .                   no 
 C24     C9         3.380(3)                     .       .                   no 
 C25     C17        3.489(3)                     .       .                   no 
 C25     C24        3.164(3)                     .       .                   no 
 C28     C16        3.319(3)                     .       .                   no 
 C28     C11        3.482(3)                     .       .                   no 
 C28     C10        3.350(3)                     .       .                   no 
 C30     C46        3.210(3)                     .       .                   no 
 C30     C40        3.589(3)                     .       .                   no 
 C31     C22        3.548(3)                     .     3_555                 no 
 C32     C10        3.549(3)                     .     4_554                 no 
 C34     C48        3.138(3)                     .       .                   no 
 C36     C52        3.199(3)                     .       .                   no 
 C37     C7         3.532(3)                     .     2_655                 no 
 C40     C42        3.193(3)                     .       .                   no 
 C40     C30        3.589(3)                     .       .                   no 
 C42     C40        3.193(3)                     .       .                   no 
 C43     C10        3.583(3)                     .       .                   no 
 C43     C5         3.414(3)                     .       .                   no 
 C44     C4         3.306(3)                     .       .                   no 
 C44     C2         3.587(3)                     .       .                   no 
 C44     C3         3.373(3)                     .       .                   no 
 C44     C5         3.502(3)                     .       .                   no 
 C45     C9         3.584(3)                     .       .                   no 
 C45     C23        3.568(3)                     .     1_655                 no 
 C46     C30        3.210(3)                     .       .                   no 
 C48     C34        3.138(3)                     .       .                   no 
 C48     C23        3.581(3)                     .     1_655                 no 
 C51     C16        3.540(3)                     .     4_654                 no 
 C52     C36        3.199(3)                     .       .                   no 
 C1      D28         3.07(2)                     .       .                   no 
 C2      H44         2.95(2)                     .       .                   no 
 C3      D21         2.88(2)                     .       .                   no 
 C3      H44         2.84(2)                     .       .                   no 
 C4      D21         3.02(2)                     .       .                   no 
 C6      H10'        2.93(3)                     .       .                   no 
 C6      H7          2.81(2)                     .       .                   no 
 C6      D28         2.83(2)                     .       .                   no 
 C7      H8'         2.89(2)                     .       .                   no 
 C7      H20"        2.80(2)                     .       .                   no 
 C7      H20'        2.86(2)                     .       .                   no 
 C7      H6"         3.03(3)                     .       .                   no 
 C8      H7"         3.07(2)                     .       .                   no 
 C8      H19"        3.06(4)                     .       .                   no 
 C8      D21         2.63(2)                     .       .                   no 
 C8      H9"         2.89(2)                     .       .                   no 
 C8      H7'         3.00(2)                     .       .                   no 
 C9      D21         2.93(2)                     .       .                   no 
 C9      H8          2.81(2)                     .       .                   no 
 C9      D24'      2.936(19)                     .       .                   no 
 C9      H10         2.93(2)                     .       .                   no 
 C9      D22         3.04(2)                     .     3_555                 no 
 C10     H9'         2.89(2)                     .       .                   no 
 C10     D28         2.96(2)                     .       .                   no 
 C10     D27'        3.02(2)                     .       .                   no 
 C10     H6          2.85(2)                     .       .                   no 
 C11     D28'        3.07(2)                     .       .                   no 
 C11     H20         2.76(2)                     .     3_556                 no 
 C12     H20         2.94(2)                     .     3_556                 no 
 C13     D21'        2.87(2)                     .       .                   no 
 C14     D21'        2.98(2)                     .       .                   no 
 C15     H16'        3.09(2)                     .     3_556                 no 
 C16     H20         2.96(2)                     .       .                   no 
 C16     D28'        2.68(2)                     .       .                   no 
 C16     H20"        2.99(2)                     .       .                   no 
 C16     H17"        2.89(2)                     .       .                   no 
 C16     H20         2.97(2)                     .     3_556                 no 
 C17     H16"        2.78(3)                     .       .                   no 
 C17     D28'        3.05(2)                     .       .                   no 
 C17     D25       3.022(19)                     .       .                   no 
 C17     H36         3.02(2)                     .     4_455                 no 
 C17     H18         3.03(2)                     .       .                   no 
 C17     H18"        3.06(2)                     .       .                   no 
 C18     D21'        2.62(2)                     .       .                   no 
 C18     H17         2.91(3)                     .       .                   no 
 C18     H19         2.86(4)                     .       .                   no 
 C19     D21'        2.87(2)                     .       .                   no 
 C19     H20'        2.73(2)                     .       .                   no 
 C19     H18'        2.89(2)                     .       .                   no 
 C20     H16'        2.81(2)                     .       .                   no 
 C20     H7'         2.83(2)                     .       .                   no 
 C20     H7          2.83(2)                     .       .                   no 
 C20     H16'        3.07(2)                     .     3_556                 no 
 C21     H18'        2.96(2)                     .       .                   no 
 C21     H9"         2.94(2)                     .       .                   no 
 C21     H18"        2.99(2)                     .       .                   no 
 C22     H31         3.04(2)                     .     3_555                 no 
 C23     H9"         2.97(2)                     .     3_555                 no 
 C24     D25'      2.880(18)                     .       .                   no 
 C24     H9'         2.91(2)                     .       .                   no 
 C24     D25       2.701(19)                     .       .                   no 
 C25     H17         3.00(3)                     .       .                   no 
 C25     D24       2.916(18)                     .       .                   no 
 C25     H10         3.04(2)                     .       .                   no 
 C25     D24'      2.722(19)                     .       .                   no 
 C28     H16         2.98(2)                     .       .                   no 
 C28     H10'        2.87(2)                     .       .                   no 
 C28     H17"        3.04(2)                     .       .                   no 
 C29     H46         2.78(2)                     .       .                   no 
 C29     H48         2.80(2)                     .       .                   no 
 C30     H46         2.78(2)                     .       .                   no 
 C31     H18'        3.07(3)                     .     3_555                 no 
 C31     D22'        2.97(2)                     .     3_555                 no 
 C32     H10'        2.75(2)                     .     4_554                 no 
 C32     H18'        2.95(3)                     .     3_555                 no 
 C34     D26'        3.04(2)                     .     4_654                 no 
 C34     H48         2.74(2)                     .       .                   no 
 C35     H52         2.80(2)                     .       .                   no 
 C35     H42         2.82(2)                     .       .                   no 
 C36     H52         2.68(2)                     .       .                   no 
 C37     H6'         3.08(2)                     .     4_554                 no 
 C38     H20"        2.94(2)                     .     4_554                 no 
 C40     H42         2.86(2)                     .       .                   no 
 C41     H30         2.88(2)                     .       .                   no 
 C41     H40         2.74(2)                     .       .                   no 
 C42     D24       3.036(19)                     .     1_655                 no 
 C42     H40         2.79(2)                     .       .                   no 
 C42     H10"        2.95(3)                     .       .                   no 
 C42     D25         2.94(2)                     .     1_655                 no 
 C43     H17         3.00(3)                     .     1_655                 no 
 C43     D25         2.87(2)                     .     1_655                 no 
 C43     D24         2.87(2)                     .     1_655                 no 
 C43     H10"        2.90(3)                     .       .                   no 
 C44     D24         2.81(2)                     .     1_655                 no 
 C44     H9          3.07(3)                     .       .                   no 
 C44     H18"        2.96(2)                     .     1_655                 no 
 C45     D23'        2.94(2)                     .     1_655                 no 
 C45     H9          2.77(3)                     .       .                   no 
 C45     D24         2.93(2)                     .     1_655                 no 
 C46     D23'        2.81(2)                     .     1_655                 no 
 C46     H30         2.91(2)                     .       .                   no 
 C46     H9          3.05(3)                     .       .                   no 
 C47     H36         2.89(2)                     .       .                   no 
 C47     H34         2.72(2)                     .       .                   no 
 C48     H34         2.67(2)                     .       .                   no 
 C49     D27         2.91(2)                     .     4_654                 no 
 C49     H9'         3.05(2)                     .     1_655                 no 
 C49     D24'      2.990(19)                     .     1_655                 no 
 C50     H9'         2.75(2)                     .     1_655                 no 
 C51     H16"        2.81(3)                     .     4_654                 no 
 C51     D25'        2.84(2)                     .     1_655                 no 
 C52     H36         2.77(2)                     .       .                   no 
 C52     D25'        2.99(2)                     .     1_655                 no 
 H6      H10'        2.31(3)                     .       .                   no 
 H6      D28         2.40(3)                     .       .                   no 
 H6      C10         2.85(2)                     .       .                   no 
 H6'     C37         3.08(2)                     .     4_555                 no 
 H6'     H16         2.39(3)                     .       .                   no 
 H6"     C7          3.03(3)                     .       .                   no 
 H6"     H7          2.57(3)                     .       .                   no 
 H7      C20         2.83(2)                     .       .                   no 
 H7      H6"         2.57(3)                     .       .                   no 
 H7      C6          2.81(2)                     .       .                   no 
 H7      H20"        2.27(3)                     .       .                   no 
 H7'     C8          3.00(2)                     .       .                   no 
 H7'     C20         2.83(2)                     .       .                   no 
 H7'     H20'        2.27(3)                     .       .                   no 
 H7"     H18         2.55(3)                     .     1_655                 no 
 H7"     H8'         2.59(3)                     .       .                   no 
 H7"     C8          3.07(2)                     .       .                   no 
 H8      C9          2.81(2)                     .       .                   no 
 H8      D21         2.28(3)                     .       .                   no 
 H8      H48         2.47(3)                     .     3_655                 no 
 H8      H9"         2.24(3)                     .       .                   no 
 H8'     H7"         2.59(3)                     .       .                   no 
 H8'     C7          2.89(2)                     .       .                   no 
 H8"     D21         2.52(3)                     .       .                   no 
 H8"     H19"        2.26(5)                     .       .                   no 
 H9      C46         3.05(3)                     .       .                   no 
 H9      C44         3.07(3)                     .       .                   no 
 H9      C45         2.77(3)                     .       .                   no 
 H9'     C49         3.05(2)                     .     1_455                 no 
 H9'     C50         2.75(2)                     .     1_455                 no 
 H9'     H10         2.42(3)                     .       .                   no 
 H9'     D24'        2.23(3)                     .       .                   no 
 H9'     C10         2.89(2)                     .       .                   no 
 H9'     C24         2.91(2)                     .       .                   no 
 H9'     H50         2.57(3)                     .     1_455                 no 
 H9"     D23         2.54(3)                     .       .                   no 
 H9"     C23         2.97(2)                     .     3_555                 no 
 H9"     C8          2.89(2)                     .       .                   no 
 H9"     C21         2.94(2)                     .       .                   no 
 H9"     H8          2.24(3)                     .       .                   no 
 H9"     D21         2.22(3)                     .       .                   no 
 H9"     D23         2.39(3)                     .     3_555                 no 
 H10     O2          2.85(2)                     .       .                   no 
 H10     C9          2.93(2)                     .       .                   no 
 H10     D25'        2.39(3)                     .       .                   no 
 H10     H9'         2.42(3)                     .       .                   no 
 H10     C25         3.04(2)                     .       .                   no 
 H10'    C28         2.87(2)                     .       .                   no 
 H10'    C6          2.93(3)                     .       .                   no 
 H10'    D27'        2.45(3)                     .       .                   no 
 H10'    D28         2.37(3)                     .       .                   no 
 H10'    H6          2.31(3)                     .       .                   no 
 H10'    H32         2.59(3)                     .     4_555                 no 
 H10'    C32         2.75(2)                     .     4_555                 no 
 H10"    C43         2.90(3)                     .       .                   no 
 H10"    C42         2.95(3)                     .       .                   no 
 H10"    H40         2.52(3)                     .       .                   no 
 H16     H6'         2.39(3)                     .       .                   no 
 H16     D28'        2.53(3)                     .       .                   no 
 H16     C28         2.98(2)                     .       .                   no 
 H16'    C15         3.09(2)                     .     3_556                 no 
 H16'    H20         2.40(3)                     .       .                   no 
 H16'    C20         3.07(2)                     .     3_556                 no 
 H16'    H20         2.57(3)                     .     3_556                 no 
 H16'    C20         2.81(2)                     .       .                   no 
 H16"    C17         2.78(3)                     .       .                   no 
 H16"    H17"        2.21(4)                     .       .                   no 
 H16"    D28'        2.31(3)                     .       .                   no 
 H16"    C51         2.81(3)                     .     4_455                 no 
 H17     C25         3.00(3)                     .       .                   no 
 H17     C43         3.00(3)                     .     1_455                 no 
 H17     H18"        2.55(4)                     .       .                   no 
 H17     C18         2.91(3)                     .       .                   no 
 H17     D25         2.30(3)                     .       .                   no 
 H17     H43         2.41(3)                     .     1_455                 no 
 H17'    H36         2.47(3)                     .     4_455                 no 
 H17"    C28         3.04(2)                     .       .                   no 
 H17"    H16"        2.21(4)                     .       .                   no 
 H17"    D28'        2.32(3)                     .       .                   no 
 H17"    C16         2.89(2)                     .       .                   no 
 H18     C17         3.03(2)                     .       .                   no 
 H18     H7"         2.55(3)                     .     1_455                 no 
 H18     H38         2.52(3)                     .     2_545                 no 
 H18'    C31         3.07(3)                     .     3_555                 no 
 H18'    H19         2.25(5)                     .       .                   no 
 H18'    D21'        2.20(3)                     .       .                   no 
 H18'    C19         2.89(2)                     .       .                   no 
 H18'    C21         2.96(2)                     .       .                   no 
 H18'    H32         2.50(3)                     .     3_555                 no 
 H18'    C32         2.95(3)                     .     3_555                 no 
 H18"    C44         2.96(2)                     .     1_455                 no 
 H18"    C21         2.99(2)                     .       .                   no 
 H18"    O1          2.67(2)                     .       .                   no 
 H18"    H17         2.55(4)                     .       .                   no 
 H18"    H44         2.58(3)                     .     1_455                 no 
 H18"    C17         3.06(2)                     .       .                   no 
 H19     C18         2.86(4)                     .       .                   no 
 H19     H18'        2.25(5)                     .       .                   no 
 H19     D21'        2.48(4)                     .       .                   no 
 H19     D27'        2.47(4)                     .     2_545                 no 
 H19'    H51         2.41(4)                     .     2_645                 no 
 H19'    H20'        2.56(4)                     .       .                   no 
 H19"    C8          3.06(4)                     .       .                   no 
 H19"    H8"         2.26(5)                     .       .                   no 
 H19"    D21'        2.57(4)                     .       .                   no 
 H20     C12         2.94(2)                     .     3_556                 no 
 H20     H16'        2.57(3)                     .     3_556                 no 
 H20     H16'        2.40(3)                     .       .                   no 
 H20     C16         2.97(2)                     .     3_556                 no 
 H20     C16         2.96(2)                     .       .                   no 
 H20     C11         2.76(2)                     .     3_556                 no 
 H20'    C7          2.86(2)                     .       .                   no 
 H20'    C19         2.73(2)                     .       .                   no 
 H20'    H7'         2.27(3)                     .       .                   no 
 H20'    H19'        2.56(4)                     .       .                   no 
 H20"    C16         2.99(2)                     .       .                   no 
 H20"    H7          2.27(3)                     .       .                   no 
 H20"    C38         2.94(2)                     .     4_555                 no 
 H20"    C7          2.80(2)                     .       .                   no 
 H20"    H38         2.52(3)                     .     4_555                 no 
 D21     H8"         2.52(3)                     .       .                   no 
 D21     H9"         2.22(3)                     .       .                   no 
 D21     H8          2.28(3)                     .       .                   no 
 D21     C3          2.88(2)                     .       .                   no 
 D21     C4          3.02(2)                     .       .                   no 
 D21     C9          2.93(2)                     .       .                   no 
 D21     C8          2.63(2)                     .       .                   no 
 D21'    C14         2.98(2)                     .       .                   no 
 D21'    C18         2.62(2)                     .       .                   no 
 D21'    C13         2.87(2)                     .       .                   no 
 D21'    H18'        2.20(3)                     .       .                   no 
 D21'    H19         2.48(4)                     .       .                   no 
 D21'    C19         2.87(2)                     .       .                   no 
 D21'    H19"        2.57(4)                     .       .                   no 
 D22     H49         2.58(3)                     .     3_655                 no 
 D22     C9          3.04(2)                     .     3_555                 no 
 D22'    C31         2.97(2)                     .     3_555                 no 
 D23     H9"         2.54(3)                     .       .                   no 
 D23     H9"         2.39(3)                     .     3_555                 no 
 D23'    C45         2.94(2)                     .     1_455                 no 
 D23'    C46         2.81(2)                     .     1_455                 no 
 D24     C43         2.87(2)                     .     1_455                 no 
 D24     C44         2.81(2)                     .     1_455                 no 
 D24     C42       3.036(19)                     .     1_455                 no 
 D24     C25       2.916(18)                     .       .                   no 
 D24     D25         2.20(3)                     .       .                   no 
 D24     C45         2.93(2)                     .     1_455                 no 
 D24'    D25         2.57(3)                     .       .                   no 
 D24'    H9'         2.23(3)                     .       .                   no 
 D24'    C9        2.936(19)                     .       .                   no 
 D24'    C25       2.722(19)                     .       .                   no 
 D24'    C49       2.990(19)                     .     1_455                 no 
 D24'    D25'        2.17(3)                     .       .                   no 
 D25     H17         2.30(3)                     .       .                   no 
 D25     D24'        2.57(3)                     .       .                   no 
 D25     C24       2.701(19)                     .       .                   no 
 D25     D24         2.20(3)                     .       .                   no 
 D25     C17       3.022(19)                     .       .                   no 
 D25     C42         2.94(2)                     .     1_455                 no 
 D25     C43         2.87(2)                     .     1_455                 no 
 D25'    C24       2.880(18)                     .       .                   no 
 D25'    C52         2.99(2)                     .     1_455                 no 
 D25'    H10         2.39(3)                     .       .                   no 
 D25'    C51         2.84(2)                     .     1_455                 no 
 D25'    D24'        2.17(3)                     .       .                   no 
 D26     H52         2.58(3)                     .     1_455                 no 
 D26'    H34         2.30(3)                     .     4_455                 no 
 D26'    C34         3.04(2)                     .     4_455                 no 
 D27     C49         2.91(2)                     .     4_455                 no 
 D27'    C10         3.02(2)                     .       .                   no 
 D27'    H10'        2.45(3)                     .       .                   no 
 D27'    H19         2.47(4)                     .     2_555                 no 
 D28     C10         2.96(2)                     .       .                   no 
 D28     H6          2.40(3)                     .       .                   no 
 D28     C6          2.83(2)                     .       .                   no 
 D28     C1          3.07(2)                     .       .                   no 
 D28     H10'        2.37(3)                     .       .                   no 
 D28'    H16"        2.31(3)                     .       .                   no 
 D28'    H17"        2.32(3)                     .       .                   no 
 D28'    C11         3.07(2)                     .       .                   no 
 D28'    C16         2.68(2)                     .       .                   no 
 D28'    C17         3.05(2)                     .       .                   no 
 D28'    H16         2.53(3)                     .       .                   no 
 H30     C41         2.88(2)                     .       .                   no 
 H30     C46         2.91(2)                     .       .                   no 
 H31     C22         3.04(2)                     .     3_555                 no 
 H32     H18'        2.50(3)                     .     3_555                 no 
 H32     H10'        2.59(3)                     .     4_554                 no 
 H33     H42         2.50(3)                     .     4_554                 no 
 H34     C47         2.72(2)                     .       .                   no 
 H34     C48         2.67(2)                     .       .                   no 
 H34     H48         2.48(3)                     .       .                   no 
 H34     D26'        2.30(3)                     .     4_654                 no 
 H36     C47         2.89(2)                     .       .                   no 
 H36     C52         2.77(2)                     .       .                   no 
 H36     H52         2.42(3)                     .       .                   no 
 H36     C17         3.02(2)                     .     4_654                 no 
 H36     H17'        2.47(3)                     .     4_654                 no 
 H38     H18         2.52(3)                     .     2_555                 no 
 H38     H20"        2.52(3)                     .     4_554                 no 
 H40     C41         2.74(2)                     .       .                   no 
 H40     C42         2.79(2)                     .       .                   no 
 H40     H10"        2.52(3)                     .       .                   no 
 H42     C35         2.82(2)                     .       .                   no 
 H42     C40         2.86(2)                     .       .                   no 
 H42     H33         2.50(3)                     .     4_555                 no 
 H43     H17         2.41(3)                     .     1_655                 no 
 H44     C2          2.95(2)                     .       .                   no 
 H44     C3          2.84(2)                     .       .                   no 
 H44     H18"        2.58(3)                     .     1_655                 no 
 H45     H46         2.52(3)                     .     3_655                 no 
 H46     C29         2.78(2)                     .       .                   no 
 H46     C30         2.78(2)                     .       .                   no 
 H46     H45         2.52(3)                     .     3_655                 no 
 H48     C29         2.80(2)                     .       .                   no 
 H48     C34         2.74(2)                     .       .                   no 
 H48     H34         2.48(3)                     .       .                   no 
 H48     H8          2.47(3)                     .     3_655                 no 
 H49     D22         2.58(3)                     .     3_655                 no 
 H50     H9'         2.57(3)                     .     1_655                 no 
 H51     H19'        2.41(4)                     .     2_655                 no 
 H52     C35         2.80(2)                     .       .                   no 
 H52     C36         2.68(2)                     .       .                   no 
 H52     D26         2.58(3)                     .     1_655                 no 
 H52     H36         2.42(3)                     .       .                   no 

#===End of Crystallographic Information File
